# Supplementary material for: Long-term effectiveness of group-based diabetes self-management on glycosylated haemoglobin for people with type 2 diabetes in community: a protocol of systematic review and meta-analysis
Source: PubMed Central journal article supplement — BMJ Open. 2021 Jun 30;11(6):e046692. doi: 10.1136/bmjopen-2020-046692 (PMC8246354; doi:10.1136/bmjopen-2020-046692), 2021-06-30
Supplement: bmjopen-2020-046692supp002.pdf [file bmjopen-2020-046692supp002.pdf]

Search Strategy for PubMed

Research date:26/07/2020.

Mesh=Medical Subject Heading.

mp=Title, Abstract.

Ptyp=Publication Type.

| Retrieval order | Retrieval word                                                                                         | Retrieval scope | Retrieval results |
|-----------------|--------------------------------------------------------------------------------------------------------|-----------------|-------------------|
| # 1             | “Diabetes Mellitus, Type 2”                                                                            | Mesh            | 134,593           |
| # 2             | diabet* AND (“type II” OR “type 2”)                                                                    | mp              | 151,627           |
| # 3             | T2DM                                                                                                   | mp              | 20,936            |
| # 4             | # 1 OR # 2 OR # 3                                                                                      |                 | 194,469           |
| # 5             | neighborhood* OR communit*                                                                             | mp              | 586,771           |
| # 6             | “Adult”                                                                                                | Mesh            | 7,250,646         |
| # 7             | “Infant” OR “Child” OR “Adolescent”                                                                    | Mesh            | 3,578,519         |
| # 8             | # 6 NOT # 7                                                                                            |                 | 5,561,112         |
| # 9             | # 4 AND # 5 AND # 8                                                                                    |                 | 3,175             |
| # 10            | “Self-Management”                                                                                      | Mesh            | 2,458             |
| # 11            | Self?care OR Self?help OR Self?manag* OR Self?admin* OR Self?concept OR self?monitor* OR self?medicat* | mp              | 103,347           |
| # 12            | # 10 OR # 11                                                                                           |                 | 103,695           |
| # 13            | group OR groups OR group-based                                                                         |                 | 4,384,977         |
| # 14            | random*                                                                                                | mp              | 1,147,385         |
| # 15            | “Randomized Controlled Trial”                                                                          | Ptyp            |                   |
| # 16            | # 14 AND # 15                                                                                          |                 | 390,384           |
| # 17            | # 9 AND # 12 AND # 13 AND # 16                                                                         |                 | 108               |
